# Supplementary material for: Transitions of Wear Characteristics for Rubber/Steel Seal&nbsp;&nbsp;Pairs During the Abrasive Wear Process
Source: Research Square preprint supplement (doi:10.21203/rs.3.rs-260400/v1), 2021-04-13
Supplement: Supplementary file 1 [file 492e1eaec7e8a133743b9a45.doc]

Declaration of Interest Statement

I am sure the research that described in my article is quite related to *Tribology Letters*. I confirm that this article has not been published previously. And all authors have seen the manuscript and approved to submit to your journal only.

Kai Zhang
